# Supplementary material for: Exhausted T cell signature predicts immunotherapy response in ER-positive breast cancer
Source: PubMed Central journal article supplement (PMC7367885; doi:10.1038/s41467-020-17414-y), 2020-07-17
Supplement: 41467_2020_17414_MOESM1_ESM.pdf [file 41467_2020_17414_MOESM1_ESM.pdf]

Supplementary Information for

**Exhausted T cell signature predicts immunotherapy response in ER-positive breast cancer.**

Terranova-Barberio et al.

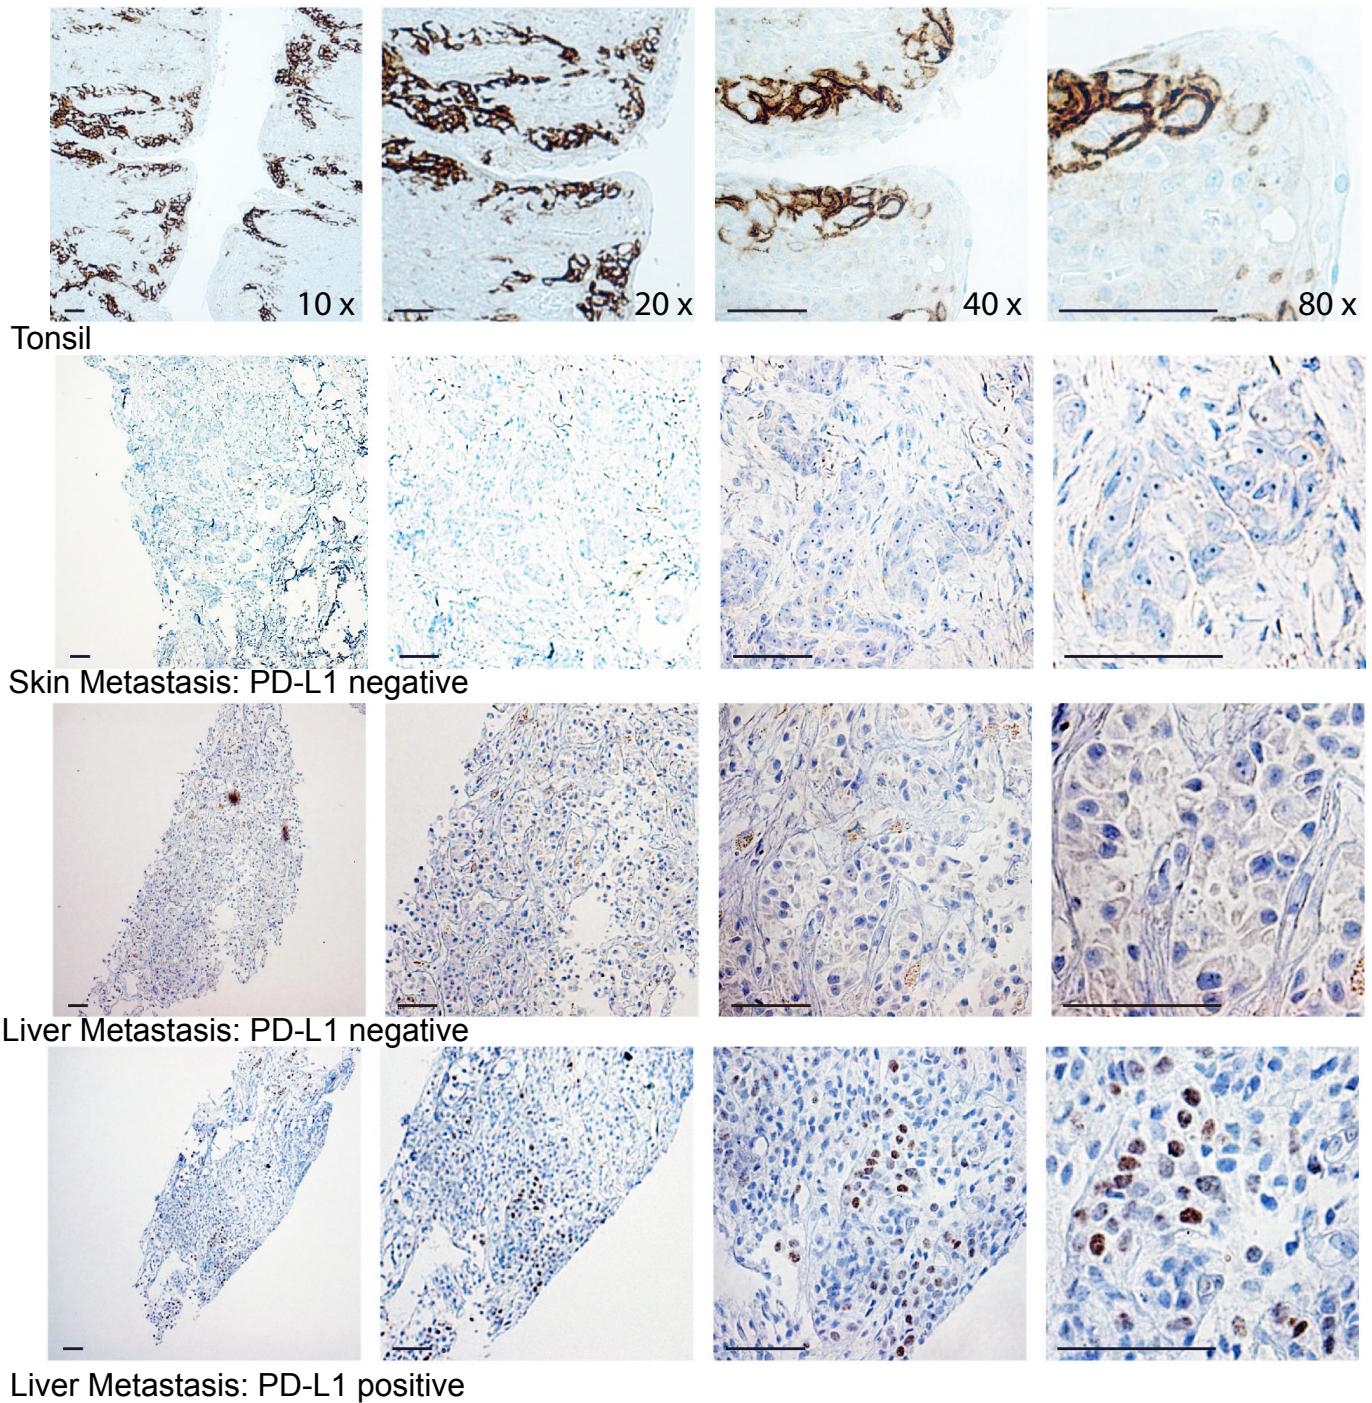

**Supplementary Figure 1: Immunohistochemistry analysis of PD-L1 expression on Paraffin-embedded tissues.** Tumors were freshly isolated from patients at each time point, when accessible. Tissue sections originated from tonsil (as positive control), skin and liver metastasis were stained and scored for PD-L1 expression (clone SP263). Representative images of each tissue are shown, captured with a 10x, 20x, 40x or 80x objective on a light microscope. Scale bar = 50 $\mu$ m. IHC staining was performed on one section/sample using an automated IHC stainer as part of standard clinical lab procedure.

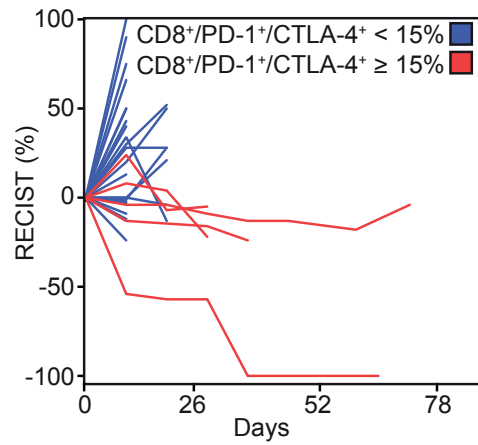

**Supplementary Figure 2: Spider plot comparing the survival of patients.** Patients with PD-1+CTLA-4+ CD8+ T cells expression in tumor or blood > 15% are shown in red, while those with % <15 are shown in blue. Median survival 8.6 vs 2.8 months, HR 0.32 (log rank), p= 0.0009.

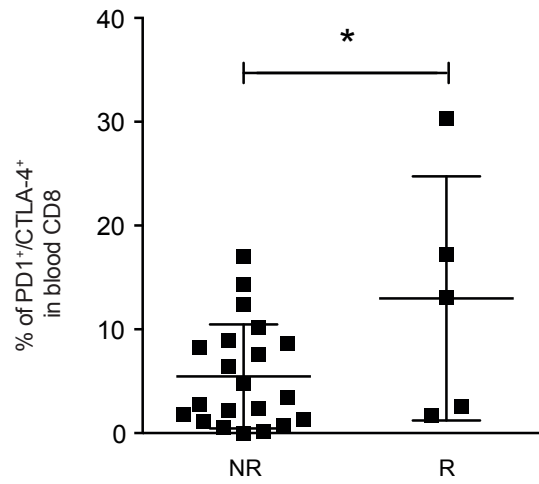

**Supplementary Figure 3:** Flow cytometry quantification of PD-1+CTLA-4+ CD8+ T-cells in non-responders (NR) versus responders (R) in blood. Data are presented as the mean  $\pm$  SD (n=26). Statistical significance is indicated by p-values as \*  $P \leq 0.05$ ; \*\*  $P \leq 0.01$ ; \*\*\*\*  $P \leq 0.0001$ ; NS = not significant and was determined by unpaired two-tailed T test with p value = 0.032.

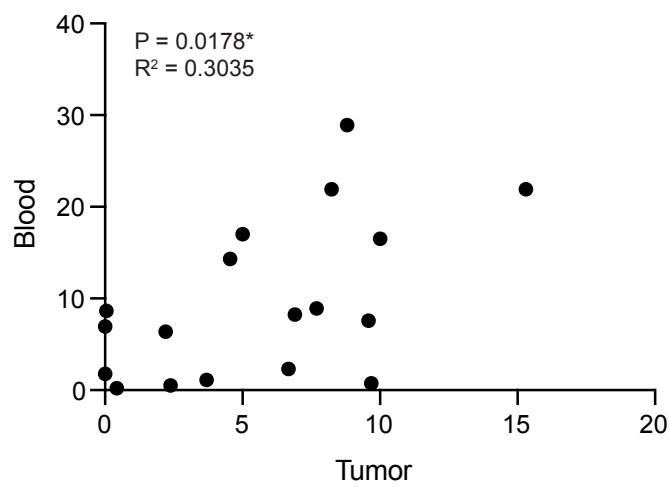

**Supplementary Figure 4:** Pearson correlation analysis of the relationship between peripheral blood and tumors, performed in non-responders (n=18). Two-sided Pearson correlation test was performed with a p value = 0.0178. Statistical significance is indicated by p-values as \*  $P \leq 0.05$ .

**A**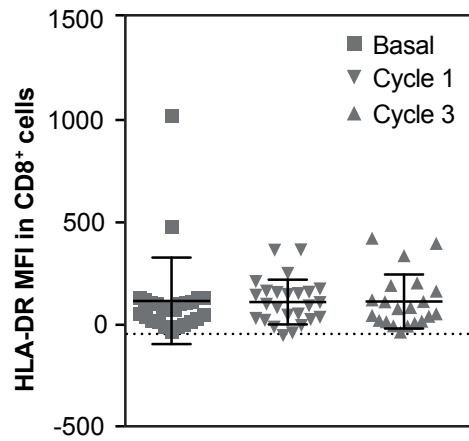**B**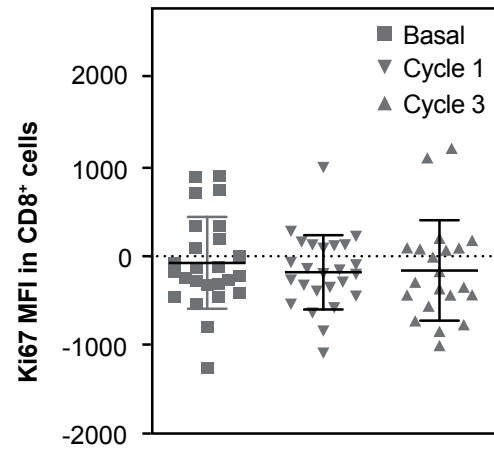

**Supplementary Figure 5:** Flow cytometric quantification of HLAFlow cytometric quantification of HLADR (A) and Ki67 (B) expression in live CD8<sup>+</sup> T-cells from blood at baseline, on day 12 of Cycle 1 and at the end of Cycle 3 (n=25). Data are presented as the mean  $\pm$  SD. No statistical significance was found in any of the panels and was determined by Kruskal-Wallis test for A and one-way ANOVA for B.



A

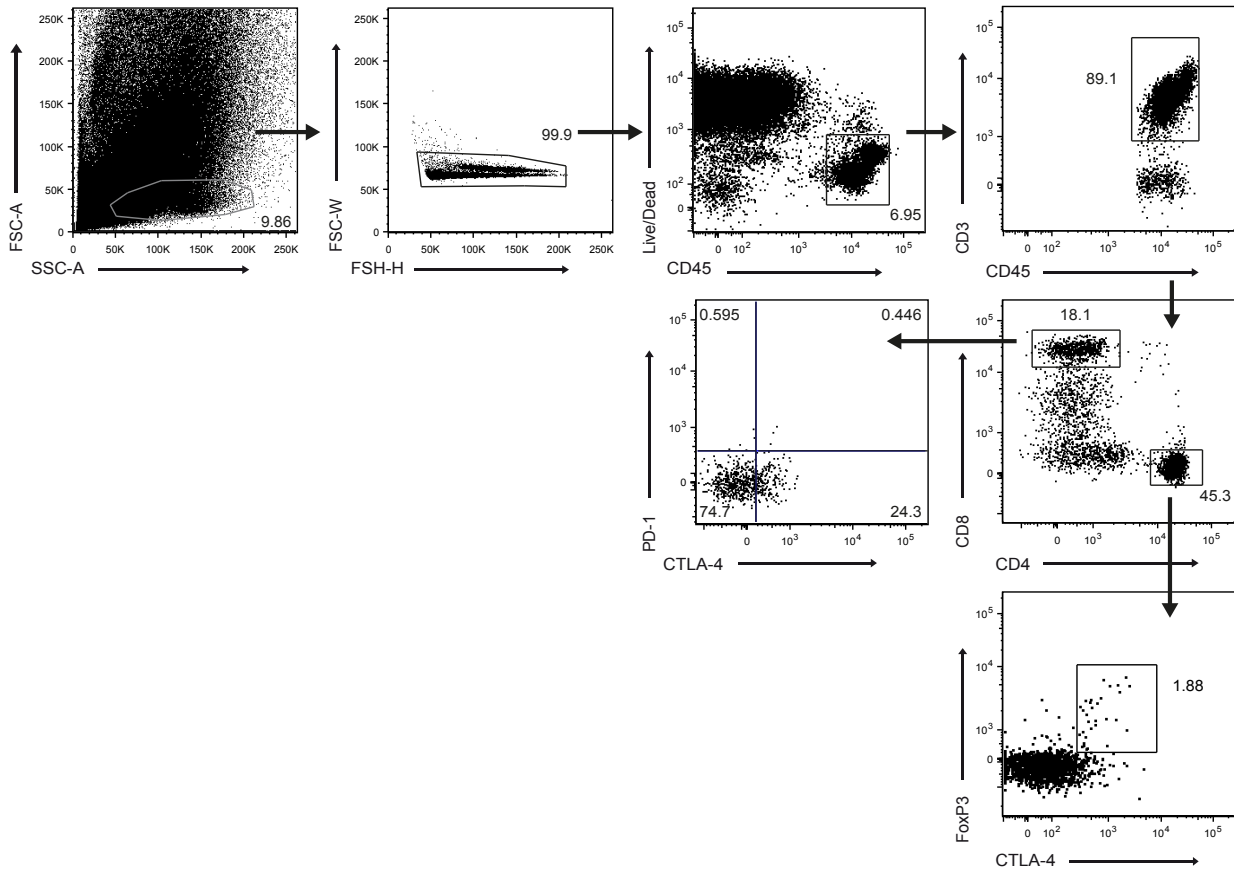

B

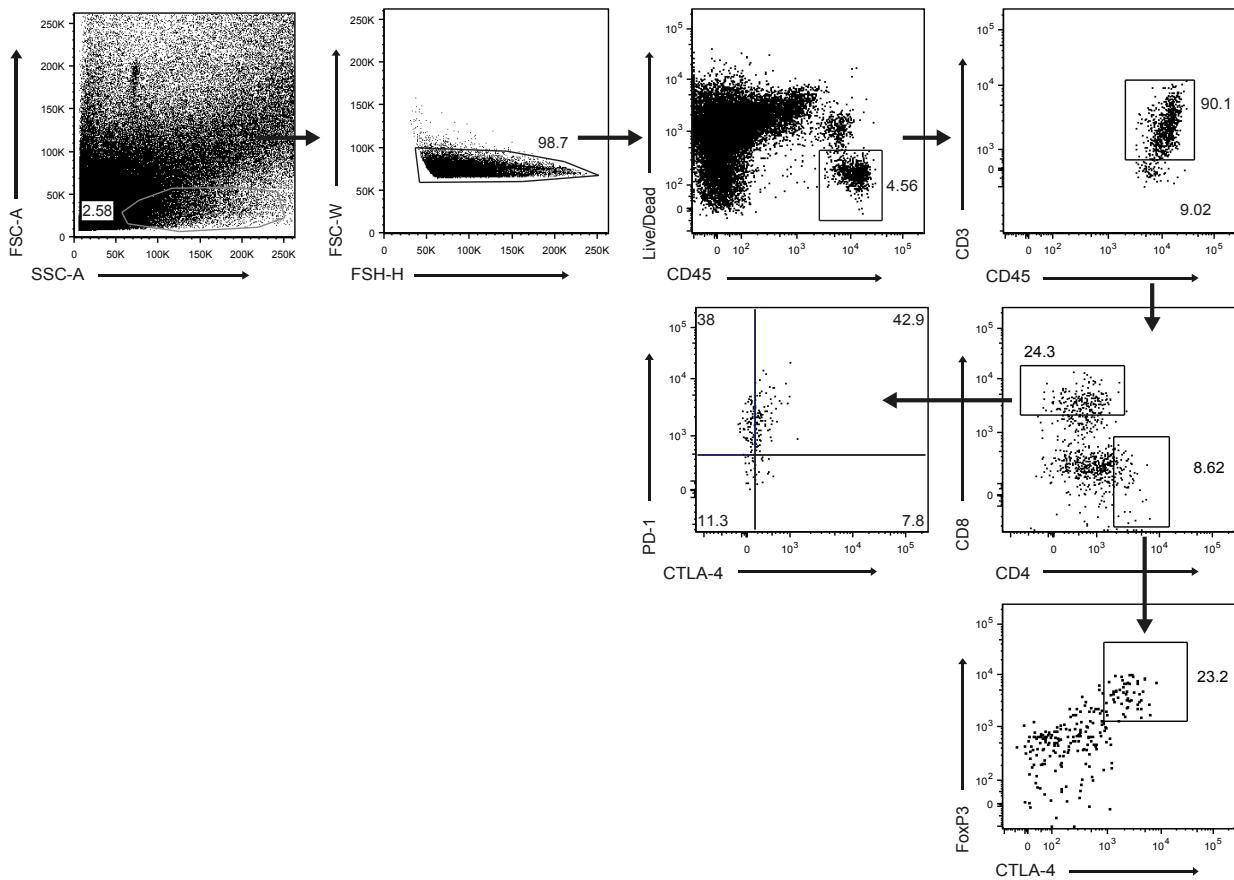

**Supplementary Figure 6. Flow cytometry gating strategy.** Gating strategy depicting a tumor specimen of a non-responder (A) and a responder (B). For isolation of CD45<sup>+</sup> cells (live CD45<sup>+</sup>), CD3<sup>+</sup> cells (live CD45<sup>+</sup>CD3<sup>+</sup>), CD4<sup>+</sup> Treg cells (live CD45<sup>+</sup>CD3<sup>+</sup>CD4<sup>+</sup>CD8<sup>-</sup>Foxp3<sup>+</sup>CTLA-4<sup>+</sup>), exhausted cytotoxic CD8<sup>+</sup> T cells (live CD45<sup>+</sup>CD3<sup>+</sup>CD4<sup>-</sup>CD8<sup>+</sup>PD-1<sup>+</sup>CTLA-4<sup>+</sup>). This gating strategy was used to identify populations described in Figure 2C-D, Figure 3, Figure 4A-C, Figure 5 and Supplementary Figure 3 and Supplementary Figure 5.

Supplementary Table 1.

| Immunophenotyping panel        |             |          |
|--------------------------------|-------------|----------|
| Biolegend                      | Cat number  | Dilution |
| anti-CD3                       | #317324     | 1:30     |
| anti-PD-1                      | #329908     | 1:30     |
| anti-CD45                      | #304049     | 1:30     |
| anti-CD8                       | #301039     | 1:30     |
| eBioscience                    |             |          |
| anti-CD4                       | #46-0047-42 | 1:30     |
| anti-CTLA-4                    | #12-1529-42 | 1:30     |
| anti-HLA-DR                    | #47-9956-41 | 1:30     |
| anti-Foxp3                     | #48-4777-42 | 1:30     |
| BD Biosciences                 |             |          |
| anti-Ki67                      | #561277     | 1:30     |
| Tonbo Bioscience               |             |          |
| Ghost Violet 510 viability dye | #13-0870    | 1:500    |

**Supplementary Table 1.** The immunophenotyping analysis was performed using these flow cytometry
